# Supplementary material for: An open access medical knowledge base for community driven diagnostic decision support system development
Source: Springer Nature journal article supplement (doi:10.1186/s12911-019-0804-1), 2019-04-27
Supplement: MOESM1 [file 16681998]

## Appendix A: Initial Mapping of Likelihood Scores for Symptoms and Signs

| <b>CODE</b> | <b>DESCRIPTORS</b>       | <b>PERCENTAGE</b> |
|-------------|--------------------------|-------------------|
| 1.0         | Always, all              | 100%              |
| 0.75        | Commonly, often          | 75%               |
| 0.5         | Probable                 | 50%               |
| 0.25        | Infrequently, uncommonly | 25%               |
| 0.1         | Rarely                   | 10%               |
| 0.0         | Never                    | 0%                |

Table 1: Initial mapping of likelihood scores for symptoms and signs
