# Supplementary material for: An open access medical knowledge base for community driven diagnostic decision support system development
Source: Springer Nature journal article supplement (doi:10.1186/s12911-019-0804-1), 2019-04-27
Supplement: MOESM3 [file 16681998]

## Appendix D: Evaluation Datasets and Results

| <i>DOI</i>              | <i>Extracted Symptoms</i>                                                                                                                                    | <i>Answer</i>                                  | <i>Rare</i> | <i>Very Difficult</i> | <i>Doknosis</i> | <i>ISABEL</i> | <i>DXplain</i> |
|-------------------------|--------------------------------------------------------------------------------------------------------------------------------------------------------------|------------------------------------------------|-------------|-----------------------|-----------------|---------------|----------------|
| 10.1056/NEJMcpcc1305994 | Fever, abd pain (LLQ), lymphoma, fatigue, weight loss, immunosuppression, thrombocytopenia                                                                   | Neutropenic enterocolitis and appendicitis     | no          | no                    | 1               | >20           | >20            |
| 10.1056/NEJMcpcc1305994 | Abd pain, bloating, rectal bleeding, weight loss, anxiety, disruptive thoughts, suicidality                                                                  | GAD                                            | no          | no                    | >20             | >20           | 4              |
| 10.1056/NEJMcpcc1305990 | Night sweats, abd pain (pleuritic), nausea, loose stools, lymphadenopathy (inguinal), plaques, leukopenia, neutrophilia, (elevated ACE)                      | Sarcoidosis / Lymphoma                         | no          | no                    | 3               | 1             | 1              |
| 10.1056/NEJMcpcc1411928 | Cough, nasal congestion, post-tussive emesis, post-tussive SOB, epistaxis                                                                                    | Pertussis                                      | no          | no                    | 3               | 16            | 1              |
| 10.1056/NEJMcpcc1200090 | Chest pain, (radiation to neck,) dyslipidemia, lung crackles, bradycardia, st elevation                                                                      | MI                                             | no          | no                    | 2               | 2             | 1              |
| 10.1056/NEJMcpcc1407131 | Fever, chest pain, chills, urticaria, chest pain, (llsb murmur,) inguinal lymphadenopathy, ivdu, tachycardia, lbp (HCV infection and substance use disorder) | Endocarditis                                   | no          | no                    | 4               | 4             | 4              |
| 10.1056/NEJMcpcc1007084 | Fever, abdominal pain, nausea, foul smelling urine                                                                                                           | EBV                                            | no          | no                    | >20             | 13            | >20            |
| 10.1056/NEJMcpcc1400841 | Dyspnea, hypoxia, tachypnea, lymphocytopenia                                                                                                                 | PCP PNA, HIV                                   | no          | no                    | 2               | 4             | 19             |
| 10.1056/NEJMcpcc1304165 | Fever, upper abd pain, weight loss, nausea, vomiting, tachycardia, firm abdomen, neck lymphadenopathy, lung nodules                                          | HIV, (miliary TB), disseminated histoplasmosis | no          | yes                   | 5               | >20           | >20            |

|                               |                                                                                                                                                                            |                                                                                      |     |     |     |     |     |
|-------------------------------|----------------------------------------------------------------------------------------------------------------------------------------------------------------------------|--------------------------------------------------------------------------------------|-----|-----|-----|-----|-----|
| 10.1056/<br>NEJMcp<br>1400842 | Abd cramping, hematochezia,<br>bloody diarrhea, back spasms, joint<br>pain, fevers, weakness, weight loss,<br>night sweats                                                 | UC, CMV infective<br>colitis                                                         | no  | yes | 13  | 3   | 1   |
| 10.1056/<br>NEJMcp<br>1410936 | Abd pain, dyspnea, diplopia,<br>dysphagia, proximal extremity<br>weakness                                                                                                  | Botulism                                                                             | yes | no  | 5   | >20 | 2   |
| 10.1056/<br>NEJMcp<br>1404517 | Weight loss, back pain &<br>tenderness, foot numbness, iritis,<br>ankle pain, knee swelling                                                                                | Ankylosing<br>Spondylitis                                                            | yes | no  | >20 | 6   | 11  |
| 10.1056/N<br>EJMcp1<br>404140 | Fever, rash, pancytopenia,<br>abnormal liver tests, fatigue,<br>headache, sore throat, arthralgias,<br>sore throat, truncal pigmented<br>macules, cervical lymphadenopathy | Measles (would<br>need to specify<br>age)                                            | yes | no  | >20 | 10  | >20 |
| 10.1056/<br>NEJMcp<br>0902223 | Fever, night sweats, diffuse pruritic<br>maculopapular rash, neck & axillary<br>lymphadenopathy, splenomegaly                                                              | T-cell Lymphoma                                                                      | yes | no  | >20 | 5   | 3   |
| 10.1056/N<br>EJMcp1<br>410939 | Abd pain, syncope, hypotension,<br>flushing, blurry vision, perioral &<br>hand tingling, diaphoresis, urinary<br>incontinence, hypotension, AMS,<br>nausea, hand swelling  | Anaphylaxis from<br>hydatid cyst                                                     | yes | yes | >20 | >20 | 16  |
| 10.1056/N<br>EJMcp1<br>400835 | (Left) chest pain, (decreased lung<br>sounds,) Calf swelling, pleural<br>effusion                                                                                          | Pleural malignant<br>tumor<br>(mesothelioma or<br>metastatic lung<br>adenocarcinoma) | yes | yes | >20 | >20 | 14  |
| 10.1056/<br>NEJMcp<br>1400838 | Headache, fever, stiff neck, AMS,<br>nausea, syncope, drowsy, truncal<br>ataxia                                                                                            | (migraine),<br>mycoplasma<br>pneumonia<br>meningitis                                 | yes | yes | 20  | 4   | 1   |
| 10.1056/<br>NEJMcp<br>1210260 | Fever, myalgias, arthritis,<br>erythematous rash, heroin use, joint<br>pain, cough, malaise, joint swelling,<br>weakness                                                   | serum sickness<br>from acute Hep B                                                   | yes | yes | >20 | >20 | 4   |
| 10.1056/<br>NEJMcp<br>1410935 | Sore throat, fatigue, hoarseness,<br>facial edema, facial swelling,<br>periorbital edema, fatigue                                                                          | Hypothyroidism,<br>statin myopathy                                                   | yes | yes | >20 | >20 | >20 |
| 10.1056/N<br>EJMcp1<br>305985 | Africa, dyspnea, cough, raised<br>violaceous lesion, HIV, malaise,<br>fatigue, weight loss, tachycardia                                                                    | Kaposi's sarcoma,<br>TB, immune<br>reconstitution<br>inflammatory<br>syndrome        | yes | yes | 3   | >20 | >20 |

|                               |                                                                                                                 |                                                        |     |     |     |     |     |
|-------------------------------|-----------------------------------------------------------------------------------------------------------------|--------------------------------------------------------|-----|-----|-----|-----|-----|
| 10.1056/<br>NEJMcp<br>1305992 | SOB, fever, CP, cough, DOE, early satiety, hoarseness, leg swelling, dysphagia, tachycardia                     | PAH                                                    | yes | yes | >20 | >20 | >20 |
| 10.1056/<br>NEJMcp<br>1209304 | Child, fever, abdominal pain, dysuria, oliguria, lethargy, diarrhea, pelvic mass                                | Burkitt's                                              | yes | no  | >20 | >20 | >20 |
| 10.1056/<br>NEJMcp<br>1400841 | SOB, DOE, hypoxia, tachypnea                                                                                    | HIV, pneumocystis pneumonia, interstitial lung disease | no  | no  | 1   | 2   | >20 |
| 10.1056/<br>NEJMcp<br>1415165 | Fever, headache, petechial rash, nausea, diffuse myalgias, neck stiffness, nuchal rigidity, (elevated) d-dimer, | Neisseria meningitis with complement deficiency        | no  | yes | >20 | >20 | >20 |

Table 1: Dataset 1 - New England Journal of Medicine

| <i>Case ID</i> | <i>Extracted Symptoms</i>                                                                                                                                                                                                                                                                                                                | <i>Answer</i>                            | <i>Rare</i> | <i>Very Difficult</i> | <i>Doknosis</i> | <i>ISABEL</i> | <i>DXplain</i> |
|----------------|------------------------------------------------------------------------------------------------------------------------------------------------------------------------------------------------------------------------------------------------------------------------------------------------------------------------------------------|------------------------------------------|-------------|-----------------------|-----------------|---------------|----------------|
| 2868           | lethargy, easy fatigability, pallor, splenomegaly, palpable spleen, palpable splenomegaly, atypical lymphocytes, leukocytosis                                                                                                                                                                                                            | hairy cell leukemia                      | yes         | no                    | 4               | 1             | >20            |
| 3083           | constipation, abdominal pain, (obese) obesity, weight loss, history of atrial fibrillation, dehydration, multiple daily vitamins, (warfarin, diltiazem, numerous daily vitamins and minerals)                                                                                                                                            | vitamin d overdose (=hypervitaminosis D) | yes         | yes                   | 1               | >20           | >20            |
| 10763          | dyspnea, cough, dry cough, smoking history, alcohol, alcoholism, alcohol use, history of alcohol abuse, history of heavy alcohol use, history of chronic alcohol consumption, elevated creatinine, serum creatinine raised, seizure, hypertension, hypertensive crisis, severe hypertension, confusion, agitation, altered mental status | nitroprusside (cyanide) toxicity         | yes         | yes                   | 14              | >20           | >20            |
| 2713           | weakness, hemiparesis, fatigue, fever, low-grade fever, low fever, low grade fever, palpitations, weight loss, murmur, diastolic murmur, (left atrial mass)                                                                                                                                                                              | intracardiac tumor (cardiac myxoma)      | yes         | yes                   | >20             | >20           | >20            |

|       |                                                                                                                                                                                                                                                                                                                                                                                                                                                                                                                 |                                     |     |     |     |     |     |
|-------|-----------------------------------------------------------------------------------------------------------------------------------------------------------------------------------------------------------------------------------------------------------------------------------------------------------------------------------------------------------------------------------------------------------------------------------------------------------------------------------------------------------------|-------------------------------------|-----|-----|-----|-----|-----|
| 2233  | adolescent, hematuria, lower abdominal pain, pelvic or lower abdominal pain, abdominal pain, deafness in child, deafness, proteinuria, protein in ua, renal failure, child                                                                                                                                                                                                                                                                                                                                      | alport syndrome                     | yes | yes | >20 | >20 | >20 |
| 3582  | diarrhea, abdominal pain, weight loss, bulky diarrhea, foul-smelling diarrhea, abdominal distension, abdominal distention, flatulence, arthralgia, polyarthralgia, chronic cough, cough, lymphadenopathy, generalized lymphadenopathy, hyperpigmentation, hyperpigmentation of skin, diastolic murmur, pas-positive macrophages in intestinal biopsy                                                                                                                                                            | whipple's disease                   | yes | yes | 1   | 5   | 1   |
| 4388  | fever, chills, pleuritic chest pain, dyspnea, positive hiv pcr, positive hiv elisa, positive hiv western blot, tachycardia, crackles on lung exam, crackles in adult, diffuse crackles, crackles, leukocytosis, lung cavitations                                                                                                                                                                                                                                                                                | s aureus endocarditis               | no  | yes | >20 | >20 | >20 |
| 4436  | african american, nocturia, recurrent otitis media, sexually active, family history of the disease                                                                                                                                                                                                                                                                                                                                                                                                              | family history (sickle cell trait)  | no  | yes | >20 | >20 | >20 |
| 3940  | adolescent, child or adolescent, adolescent or young adult, facial swelling, fatigue, loss of appetite, decreased appetite, decrease in appetite, "history of travel to southeast asia and australia, or middle east, india or china", "history of travel to china, india, malaysia, the philippines, indonesia, or various pacific islands", china, travel to china, periorbital edema, hypoalbuminemia, decreased albumin, decreased serum albumin, hepatitis b infection, proteinuria, nephrotic proteinuria | membranous nephropathy              | no  | yes | >20 | 2   | 1   |
| 3061  | white cell casts in urine, arthralgia, rash, recent antibiotic use, fever, sexually active, dysuria, polyuria, urinary frequency, (increased urinary frequency,) acute renal failure, proteinuria, mild proteinuria, maculopapular rash                                                                                                                                                                                                                                                                         | Drug-induced interstitial nephritis | no  | yes | 17  | 5   | 7   |
| 10670 | bump, nonpruritic skin lesions, palpable nodule, subcutaneous nodules, nontender firm subcutaneous nodules                                                                                                                                                                                                                                                                                                                                                                                                      | epidermal inclusion cyst            | no  | yes | >20 | >20 | >20 |

|      |                                                                                                                                                                                                                                                    |                                                                                                              |     |     |     |     |     |
|------|----------------------------------------------------------------------------------------------------------------------------------------------------------------------------------------------------------------------------------------------------|--------------------------------------------------------------------------------------------------------------|-----|-----|-----|-----|-----|
| 4497 | infant, ventricular septal defect, stridor, murmur, holosystolic murmur loudest at left sternal border, systolic murmur, pansystolic murmur, (stridor improves with neck extension)                                                                | vascular ring                                                                                                | yes | yes | >20 | >20 | >20 |
| 4239 | child, acne, (advanced bone age, coarse axillary and pubic hair, severe cystic acne, low LH, negative GNRH stimulation, tall)                                                                                                                      | nonclassic congenital adrenal hyperplasia (21-hydroxylase deficiency, gonadotropin independent (peripheral)) | yes | yes | >20 | >20 | >20 |
| 2664 | slurred speech, trouble walking, difficulty walking, drowsiness, (history of) insomnia, (history of) migraine, (history of) migraines, history of epilepsy, lethargy, hyporeflexia, (bipolar disorder, history of hypothyroidism, reactive pupils) | benzodiazepine overdose                                                                                      | no  | yes | >20 | >20 | >20 |
| 3396 | infant, seizure, grand mal seizure, aka tonic-clonic seizure, seizure in infant, full-term, retinal hemorrhage, (increased head circumference)                                                                                                     | shearing of subdural veins (non-accidental trauma)                                                           | yes | yes | >20 | >20 | >20 |
| 3769 | pulmonary fibrosis, pneumonitis                                                                                                                                                                                                                    | amiodarone (toxicity)                                                                                        | no  | no  | >20 | >20 | >20 |
| 3872 | newborn, difficulty feeding, poor feeding, cyanosis, dyspnea                                                                                                                                                                                       | Choanal atresia                                                                                              | yes | no  | >20 | >20 | >20 |
| 4114 | nodules on cxr, nodules on chest x-ray, lung nodules, (mississippi, southern united states, nonsmoker)                                                                                                                                             | histoplasmosis                                                                                               | no  | no  | >20 | 1   | 4   |
| 3146 | solitary, poor eye contact, (not bothered)                                                                                                                                                                                                         | schizoid personality disorder                                                                                | no  | no  | 1   | >20 | >20 |
| 2746 | rash, rash on trunk, itching, itchiness, itchy rash, sexually active                                                                                                                                                                               | tinea corporis                                                                                               | no  | no  | >20 | >20 | >20 |

|      |                                                                                                                                                                                                                                     |                                             |    |    |     |     |     |
|------|-------------------------------------------------------------------------------------------------------------------------------------------------------------------------------------------------------------------------------------|---------------------------------------------|----|----|-----|-----|-----|
| 4635 | sexual dysfunction, male, impotence, weight loss, gynecomastia, low t3, low t4, (chronic) hypogonadism, testicular atrophy                                                                                                          | chronic liver disease (alcoholic cirrhosis) | no | no | >20 | >20 | >20 |
| 3379 | child, male, behavioral changes, poor eye contact, restricted behaviors, solitary                                                                                                                                                   | Autism spectrum disorder                    | no | no | >20 | >20 | >20 |
| 3951 | dyspnea on exertion, palpitations, widened pulse pressure                                                                                                                                                                           | aortic regurgitation                        | no | no | >20 | >20 | 1   |
| 3574 | shoulder pain, history of anterior shoulder pain exacerbated by lifting or elevated pushing or pulling of objects                                                                                                                   | subacromial bursitis                        | no | no | >20 | >20 | >20 |
| 4253 | pain behind the eyes, eye pain, severe eye pain, sharp or stabbing pain, alcoholism, ptosis, ptosis with miosis (partial horner syndrome), miosis, pain awaking patient at night, sudden awakening, intense pain, retroorbital pain | cluster headache                            | no | no | 1   | 1   | 1   |
| 4434 | abdominal pain, epigastric pain, acute onset of epigastric pain, vomiting, improved by sitting up and leaning forward, hyperlipidemia, smoking history, alcohol use, alcohol, alcoholism, left sided pleural effusion               | acute pancreatitis                          | no | no | 1   | 1   | 1   |
| 2860 | eye pain, red eye, eye redness, watery eyes, watering of the eye, vesicles, dendritic ulcer, corneal ulceration                                                                                                                     | herpes simplex keratitis                    | no | no | 1   | 3   | 4   |
| 4897 | paranoia, delusion, nonbizarre delusions                                                                                                                                                                                            | delusional disorder                         | no | no | 1   | 6   | 2   |
| 4772 | loss of consciousness, trouble walking, difficulty walking, skin infections, diabetic, diabetes mellitus, hypotension, shock, tachycardia, (cold, clammy skin), cool clammy skin, pulmonary hypertension, syncope, (normal pcwp)    | pulmonary embolism                          | no | no | >20 | 7   | 1   |
| 4306 | weight loss, fever, cough, sputum production, productive cough, nausea, abdominal pain, dizziness, (postural dizziness, subnormal cortisol rise with cosyntopin stimulation test, bilateral adrenal calcification)                  | tuberculosis                                | no | no | >20 | 15  | 17  |

|      |                                                                                                                                                                                                                                                                                                                                                                                                |                                   |    |    |     |     |     |
|------|------------------------------------------------------------------------------------------------------------------------------------------------------------------------------------------------------------------------------------------------------------------------------------------------------------------------------------------------------------------------------------------------|-----------------------------------|----|----|-----|-----|-----|
| 2452 | bilious vomiting, newborn, vomiting, maternal polyhydramnios, delayed passage of meconium, hypotonia, enlarged tongue, (protruding tongue), up-slanting palpebral fissure, low-set ears, fifth finger clinodactyly, holosystolic murmur loudest at left sternal border, thrill, precordial thrill, down syndrome                                                                               | duodenal atresia                  | no | no | 1   | >20 | 2   |
| 4486 | central america, travel to central america, nausea, vomiting, suicidality, suicidal behavior, diabetes mellitus - type 2, diabetes mellitus, smoking history, tachycardia, dehydration, (presence of a gastric splash, hear four hours or more after the last meal,) peptic ulcer disease, vomiting of partially digested food, history of acid ingestion, early satiety                       | pyloric stricture                 | no | no | 1   | >20 | 1   |
| 4463 | anorexia, nausea, weakness, amiodarone, atrial fibrillation, history of atrial fibrillation, furosemide, digoxin                                                                                                                                                                                                                                                                               | drug interaction (digoxin)        | no | no | 0   | >20 | >20 |
| 4331 | african american, "african american (in us)", fever, jaundice, abdominal pain, dark urine, tachycardia, (bite cells on peripheral smear, RBC inclusions on crystal violet stain)                                                                                                                                                                                                               | G6PD Deficiency                   | no | no | >20 | >20 | >20 |
| 3959 | slurred speech, hand weakness, focal weakness, history of myocardial infarction, aspirin use, other known associations include penicillins, cephalosporins, enalapril, rifampin, nsaid, smoking history, hypertension, dysarthria                                                                                                                                                              | lacunar stroke (hypertension)     | no | no | >20 | >20 | 15  |
| 2901 | liver disease, fatigue, ascites, furosemide, (history of) esophageal varices, beta blocker, (beta-blocker use,) tachycardia, abdominal pain, ascites, elevated cell count in ascitic fluid (abdominal discomfort, history of chronic ascites, history of alcoholic liver disease, ascitic fluid with high neutrophils, high serum-ascites albumin gradient (SAAG), no free air on upright cxr) | spontaneous bacterial peritonitis | no | no | 1   | 1   | 1   |
| 4118 | fever, productive cough, putrid sputum, recurrent pneumonia, smoking history, alcoholism, history of alcohol abuse, history of heavy alcohol use, infiltrates on cxr, hypoxemia, consolidation on cxr, crackles, crackles in adult, crackles on lung exam, dyspnea                                                                                                                             | aspiration pneumonia              | no | no | 1   | 3   | 13  |
| 3037 | midwestern united states, fever, night sweats, cough, productive cough, weight loss, subacute, subacute onset, rash, skin lesion, skin lesions, verrucous skin lesions, lytic lesions on bone films, osteolytic lesions, consolidation on cxr                                                                                                                                                  | blastomycosis                     | no | no | 2   | >20 | >20 |

|      |                                                                                                                                                                                              |                                                           |     |    |     |     |     |
|------|----------------------------------------------------------------------------------------------------------------------------------------------------------------------------------------------|-----------------------------------------------------------|-----|----|-----|-----|-----|
| 4698 | upper extremity atrophy, trauma, history of trauma, weakness                                                                                                                                 | Syringomyelia                                             | yes | no | 1   | 7   | >20 |
| 3815 | oral ulcers, blurry vision, vision changes, anterior uveitis, uveitis, genital ulcers, multiple painful genital ulcers, nodular lesions, hypopigmented lesions                               | behcet's disease                                          | yes | no | >20 | >20 | 1   |
| 4241 | presentation with isolated knee or thigh pain, pain with walking, pain on walking, history of copd, smoking history, visible bulge in the groin, (pulsatile groin mass, anterior thigh pain) | femoral artery aneurysm                                   | yes | no | >20 | >20 | >20 |
| 3548 | child, polydipsia, polyuria, incontinence, urinary incontinence, incontinence of bladder, fatigue, dehydration, (enuresis)                                                                   | autoimmune destruction of the pancreatic beta cells (DMI) | no  | no | 4   | 1   | 2   |
| 3679 | vulvar burning, vulvar pruritis, vaginal discharge, green vaginal discharge, frothy vaginal discharge, thin vaginal discharge, (ph 5.5)                                                      | flagellated motile organisms                              | no  | no | 2   | 2   | 1   |

Table 2: Dataset 2 - UWORLD

| <i>Source</i>                             | <i>Extracted Symptoms</i>                                                                                                                                                                                                                                                   | <i>Answer</i>                                     | <i>Rare</i> | <i>Very Difficult</i> | <i>Doknosis</i> | <i>ISABEL</i> | <i>DXplain</i> |
|-------------------------------------------|-----------------------------------------------------------------------------------------------------------------------------------------------------------------------------------------------------------------------------------------------------------------------------|---------------------------------------------------|-------------|-----------------------|-----------------|---------------|----------------|
| Am J Trop Med Hyg. 1992 Feb;46(2):146-50. | patient younger than 45 years, african american, farmer, south america, weakness, cough, fever, weight loss, myalgia, dyspnea, shaking chills, bilateral diffuse pulmonary infiltrates on cxr, honeycombing on cxr, granulomas on chest x-ray, fungus present on microscopy | Fulminant disseminated pulmonary adiaspiromycosis | yes         | yes                   | >20             | >20           | >20            |
| Am J Trop Med Hyg. 1992 Feb;46(2):161-4.  | female, adolescent or young adult, travel to north africa, fever. diarrhea, chills, peripheral neuropathy. myalgia, exposure to ticks, tick bite, arthralgia, elevated erythrocyte sedimentation rate (esr) (esr)                                                           | Ehrlichiosis                                      | no          | no                    | 7               | >20           | 2              |



|                                           |                                           |                                                                                                                                                                                                                                                                                                                                                                                                                                                                                  |                                                                               |     |     |     |     |     |
|-------------------------------------------|-------------------------------------------|----------------------------------------------------------------------------------------------------------------------------------------------------------------------------------------------------------------------------------------------------------------------------------------------------------------------------------------------------------------------------------------------------------------------------------------------------------------------------------|-------------------------------------------------------------------------------|-----|-----|-----|-----|-----|
| Am J Trop Med Hyg. 1991 Dec;45(6):723-7.  | Am J Trop Med Hyg. 1992 Jul;47(1):10-2.   | young adult, travel to southeast asia, history of travel to china, india, malaysia, the philippines, indonesia, or various pacific islands, male, dyspepsia, abdominal pain, diarrhea, headache, fatigue, weight loss, fever, pruritus, ingestion of raw fish, abdominal tenderness, tender hepatomegaly, (eosinophilaxova present in stool)                                                                                                                                     | Acute amoebic dysentery (capillariasis--capillaria philippinesis)             | no  | no  | 5   | >20 | >20 |
| Am J Trop Med Hyg. 1989 Mar;40(3):323-5.  | Am J Trop Med Hyg. 1981 Jan;30(1):145-8.  | male adult human immunodeficiency virus (hiv) positive t. Cruzi, fever, headache, brazil, hemophilia, hepatomegaly, splenomegaly ,leukopenia, africa, infant, fever, cough, chronic diarrhea, lymphadenopathy ,gingivitis, stomatitis, hepatomegaly, splenomegaly, hepatosplenomegaly, painful violaceous papule, skin nodules,positive hiv elisa                                                                                                                                | Chagas' disease (trypanosoma cruzi)                                           | no  | no  | 1   | 17  | >20 |
| Am J Trop Med Hyg. 1984 Nov;33(6):1155-8. | Am J Trop Med Hyg. 1982 Mar;31(2):226-9.  | brazil, travel to south america, female, young adult, fever, chills, headache, abdominal pain, arthralgia, myalgia, jaundice, epigastric tenderness, hyperbilirubinemia, elevated ast and alt, uremia, elevated erythrocyte sedimentation rate (esr), albuminuria, sterile pyuria, negative leptospirosis serology, negative cmv serology, flavivirus                                                                                                                            | Acquired immune deficiency syndrome (aids)--Lympho-cutaneous Kaposi's sarcoma | no  | yes | 11  | 10  | 1   |
| Am J Trop Med Hyg. 1984 Nov;33(6):1155-8. | Am J Trop Med Hyg. 1984 Nov;33(6):1155-8. | adult, male, history of travel to china, india, malaysia, the philippines, indonesia, or various pacific islands, fresh water exposure, recent skin contact with fresh water, fever, headache, nausea, vomiting, visual changes, hepatomegaly ,eosinophila ,leukocytosis, gradually increasing headache and confusion, elevated erythrocyte sedimentation rate (esr), elevated lactate dehydrogenase (ldh), elevated ast and alt, csf eosinophilia, schistosomiasis ova in stool | St louis encephalitis                                                         | yes | yes | >20 | >20 | >20 |
| Am J Trop Med Hyg. 1982 Mar;31(2):226-9.  | Am J Trop Med Hyg. 1984 Nov;33(6):1155-8. | male, adolescent or young adult, contact with cattle, contact with farm animals, fever, malaise, nausea, abdominal pain, anorexia, diarrhea, positive cryptosporidium naat of stool                                                                                                                                                                                                                                                                                              | Schistosomiasis - mansoni (japonica-in case report) (acute)                   | no  | no  | 8   | 10  | >20 |
|                                           |                                           |                                                                                                                                                                                                                                                                                                                                                                                                                                                                                  | Cryptosporidiosis                                                             | no  | no  | 8   | >20 | 1   |

|                                             |                                                                                                                                                                                                                                                                                                                                                                                                                                                                                                                                                                    |                                                  |     |     |   |     |     |
|---------------------------------------------|--------------------------------------------------------------------------------------------------------------------------------------------------------------------------------------------------------------------------------------------------------------------------------------------------------------------------------------------------------------------------------------------------------------------------------------------------------------------------------------------------------------------------------------------------------------------|--------------------------------------------------|-----|-----|---|-----|-----|
| Am J Trop Med Hyg.<br>1996 Dec;55(6):584-5. | adult history of travel to china, india, malaysia, the philippines, indonesia, or various pacific islands diarrhea weight loss female malaise nausea anorexia fatigue fungal infection elevated erythrocyte sedimentation rate (esr) (esr) cyclospora in stool smear                                                                                                                                                                                                                                                                                               | Cyclosporiasis (cyclospora infection)            | no  | no  | 1 | >20 | 2   |
| Am J Trop Med Hyg.<br>1999 Jul;61(1):34-6.  | asian descent, travel to asia, travel to southeast asia, southeast asia, male adult, fever, abdominal pain, left upper quadrant abdominal pain, walking barefoot, chills, history of diabetes, hyperglycemia, elevated ast, elevated alkaline phosphatase, interstitial infiltrates on cxr, adrenal gland involvement, adrenal enlargement, burma, burkholderia pseudomallei                                                                                                                                                                                       | Melioidosis                                      | yes | yes | 1 | >20 | >20 |
| Am J Trop Med Hyg. 2006 May;74(5):901-4.    | taiwan, recent travel to southeast asia or latin america, travel to southeast asia, acute abdomen, thrombocytopenia, lymphocytosis, elevated aptt, elevated pt, elevated alt and ast, fever, myalgia, headache, petechial rash                                                                                                                                                                                                                                                                                                                                     | Dengue shock syndrome (dengue hemorrhagic fever) | no  | yes | 7 | 4   | 2   |
| Am J Trop Med Hyg. 2006 Aug;75(2):303-6.    | maleage over 40, fever, fatigue, headache, contact with farm animals, farmer, neurologic symptoms, leukocytosis, eosinophilia, lung nodules, elevated ige, increased ige, ingestion of raw poultry, positive toxocara serology, ascaris larvae in tissuecough                                                                                                                                                                                                                                                                                                      | Toxocariasis (visceral larva migrans)            | no  | no  | 1 | >20 | 1   |
| Am J Trop Med Hyg. 2007 May;76(5):886-7.    | young adult, young adult and adolescent, adolescent or young adult, male, south america, fever, abdominal pain dyspnea, hypotension, tachycardia, tachypnea, hypoxia. bilateral diffuse infiltrates on cxr, hypoxemia, hyperglycemia, elevated serum lipase, elevated serum amylase, elevated serum creatinine, elevated alt and ast, hyperbilirubinemia, conjugated hyperbilirubinemia, elevated alkaline phosphatase, increased creatinine phosphokinase, leukocytosis, thrombocytopenia, hepatomegaly, positive leptospira microscopic agglutination test (mat) | Leptospirosis                                    | yes | yes | 2 | >20 | >20 |

|                                                              |                                                                                                                                                                                                                                                                                                                                             |                                                                       |     |     |     |     |     |
|--------------------------------------------------------------|---------------------------------------------------------------------------------------------------------------------------------------------------------------------------------------------------------------------------------------------------------------------------------------------------------------------------------------------|-----------------------------------------------------------------------|-----|-----|-----|-----|-----|
| Am J Trop Med Hyg. 2007 Nov;77(5):891-2.                     | maleage 30-60, thailand, tick bite, fever, myalgia, conjunctival injection, petechial rash, weakness, generalized edema, thrombocytopenia, elevated alt and ast, elevated alkaline phosphatase, positive rickettsia serology                                                                                                                | Spotted fevers - rickettsial                                          | yes | no  | 2   | 2   | 1   |
| Am J Trop Med Hyg. 2007 Dec;77(6):1096-8.                    | male, adult, aids, history of aids, headache, blurred vision, fever, ring enhancing lesion on imaging                                                                                                                                                                                                                                       | Brain abscess (disseminated balamuthia mandrillaris amoeba infection) | no  | no  | 1   | 4   | 1   |
| Am J Trop Med Hyg. 2008 Jan;78(1):7.                         | female, india, history of travel to china, india, malaysia, the philippines, indonesia, or various pacific islands, fever, myalgia, headache, melena, hepatomegaly, abdominal distension, thrombocytopenia. positive dengue serology                                                                                                        | Dengue shock syndrome                                                 | no  | yes | 1   | 1   | 1   |
| Am J Trop Med Hyg. 2008 Jan;78(1):8>200.                     | male age greater than 50, fever chills, bone pain, gum bleeding, thrombocytopenia, travel to asia, stocking and glove distribution of sensory neuropathy, nausea, diarrhea, cough, bloody sputum, maculopapular rash, petechial rash, testicular swelling, elevated ast and alt, hematuria, positive dengue serology, positive dengue elisa | Dengue shock syndrome                                                 | no  | yes | 9   | 6   | 1   |
| Eur J Intern Med. 2008 Mar;19(2):                            | adult, male, diarrhea, fever, pericarditis, bloody diarrhea, travel to africa. abdominal pain, elevated lactate dehydrogenase (ldh), positive shigella stool culture                                                                                                                                                                        | Shigellosis                                                           | no  | no  | 6   | 2   | 15  |
| Indian J Med Microbiol. 2009 Jan-Mar;27(1):65-6.             | male, india, history of travel to southeast asia and australia, or middle east, india, or china, fever, adult, chills, diarrhea, altered mental status, tachypnea, weakness, hepatomegaly ,elevated erythrocyte sedimentation rate (esr) (esr), pyuria, resistance to malaria, positive salmonella pcr, bloody diarrhea                     | Typhoid and enteric fever (salmonella enterica serotype isangi)       | no  | no  | 1   | 4   | >20 |
| Am J Trop Med Hyg. 2010 Mar;82(3):371-5. doi: 10.4269/ajtmh. | male, adult, endemic to sub-saharan african or south america, africa, farmer, fever, arthralgia, nausea, vomiting, scleral icterus, abdominal pain, right upper quadrant abdominal pain, hematemesis, malaise                                                                                                                               | Rift valley fever                                                     | yes | no  | >20 | >20 | >20 |

|                                                                           |                                                                                                                                                                                                                                                                                                                                                                                                                                                                           |                                                        |     |     |    |     |     |
|---------------------------------------------------------------------------|---------------------------------------------------------------------------------------------------------------------------------------------------------------------------------------------------------------------------------------------------------------------------------------------------------------------------------------------------------------------------------------------------------------------------------------------------------------------------|--------------------------------------------------------|-----|-----|----|-----|-----|
| Am J Trop Med Hyg. 2010 Jul;83(1):10-23. doi: 2-3.                        | age younger than 60, africa, dyspnea, hacking cough, headache, facial edema, cardiac disease, superior vena cava syndrome, positive echinococcus serology                                                                                                                                                                                                                                                                                                                 | Echinococcosis - pulmonary cysts (cardiac hydatidosis) | no  | no  | 10 | >20 | >20 |
| Am J Trop Med Hyg. 2011 Jun;84(6):84-3-4. doi: 3-4.                       | young adult, male, fever, chills, dry cough, cough, flank pain, oliguria, elevated creatinine, sterile pyuria, lung nodules, lung cavitations, lymphadenopathy, south america, positive tuberculosis elispot                                                                                                                                                                                                                                                              | Tuberculosis                                           | no  | yes | 2  | 5   | 1   |
| Am J Trop Med Hyg. 2011 Nov;85(5):952-6. doi: 10.4269/ajtmh.2011.11-0165. | maleage greater than 60,australia, southeast asia, fever, elevated c-reactive protein, neutrophilia, altered mental status, myoclonic jerks, hypertonia, cogwheel rigidit elevated protein concentration of csf csf pleocytosis xc sf lymphocytosis history of hypertension                                                                                                                                                                                               | West Nile fever - neuroinvasive                        | yes | yes | 1  | >20 | 12  |
| Am J Trop Med Hyg. 2012 Jan;86(1):                                        | male adult rice water diarrhea fever fresh water exposure                                                                                                                                                                                                                                                                                                                                                                                                                 | Cholera                                                | no  | no  | 3  | >20 | 6   |
| Chang Gung Med J. 2011;34(6 Suppl):52-5.                                  | male, elderly, mediterranean and central european location, europe, fever, chills, diaphoresis, malaise, anorexia, weight loss, nausea, vomiting, headache, ingestion of unpasteurized dairy products, tachycardia, tachypnea, hepatomegaly, splenomegaly, thrombocytopenia, elevated erythrocyte sedimentation rate (esr) (esr), elevated ast and alt, elevated ggt, elevated alkaline phosphatase, elevated alkaline phosphatase/ggt, brucella agglutination titer >160 | Brucellosis (with spontaneous splenic rupture)         | yes | yes | 12 | 2   | 2   |
| Acta Medica (Hradec Kralove). 2012;55(3)                                  | child nausea vomiting male abdominal pain - right lower back pain rebound tenderness                                                                                                                                                                                                                                                                                                                                                                                      | Acute appendicitis                                     | no  | no  | 1  | 1   | 1   |
| Am J Trop Med Hyg. 2013 Jun;88(6):                                        | age greater than 60, elderly, female, farmer, fever, japan, fatigue, eschar at site of arthropod bite, rash on trunk                                                                                                                                                                                                                                                                                                                                                      | Malaria - p. vivax(this seems like rickettsial pox)    | no  | yes | 1  | >20 | 16  |

|                                         |                                                                  |                                                |                                                   |                                         |                                                                    |                                                                                                                                                                                                                                                            |                                                                       |     |     |     |     |     |
|-----------------------------------------|------------------------------------------------------------------|------------------------------------------------|---------------------------------------------------|-----------------------------------------|--------------------------------------------------------------------|------------------------------------------------------------------------------------------------------------------------------------------------------------------------------------------------------------------------------------------------------------|-----------------------------------------------------------------------|-----|-----|-----|-----|-----|
| Arthritis Rheum. 2008 Nov;58(11):3632-1 | Am J Trop Med Hyg. 2014 Nov;91(5):1035-8. doi: 10.4269/ajtmh.14- | Tex Heart Inst J. 2014 Apr 1;41(2):222-6. doi: | J Infect Dev Ctries. 2014 Feb 13;8(2):237-9. doi: | Int J Surg Case Rep. 2013;4(11):1032-4. | BMC Infect Dis. 2013 Aug 8;13:369. doi: 10.1186/1471-2334>203-369. | female, young adult, travel to south america, recent travel to southeast asia or latin america, polyarthritis, polyarthritis, contact with monkey, fever, headache, oral ulcers, maculopapular rash, mosquito exposure, mosquito bite,                     | Mayaro virus infection                                                | yes | no  | >20 | >20 | >20 |
|                                         |                                                                  |                                                |                                                   |                                         |                                                                    | Fever, right lower abdominal pain, vomiting, thrombocytopenia, leukopenia, tachycardia                                                                                                                                                                     | Dengue fever mimicking acute appendicitis                             | yes | no  | 5   | 4   | 15  |
|                                         |                                                                  |                                                |                                                   |                                         |                                                                    | male, immunocompromised, immunosuppression, india, abdominal pain, diarrhea, fever, positive sirs criteria, fecal leukocytes, positive shigella stool culture, adult (post renal transplant?)                                                              | Shigellosis (shigellemia)                                             | no  | no  | 9   | 3   | 14  |
|                                         |                                                                  |                                                |                                                   |                                         |                                                                    | male hypertension adult obese hyperlipidemia smoking history history chest pressure angina syncope st elevation on ecg elevated troponin q waves on ecg                                                                                                    | Acute myocardial infarction (heart attack)                            | no  | no  | 1   | 1   | 1   |
|                                         |                                                                  |                                                |                                                   |                                         |                                                                    | female, thailand, southeast asia, mosquito bite, fever, chills, oral lesions, maculopapular rash, maculopapular rash on trunk spreading to neck and extremities, headache ,conjunctivitis, arthralgia, myalgia, thrombocytopenia, positive dengue serology | Dengue hemorrhagic fever (this case is for zika virus)                | yes | yes | 5   | 2   | 1   |
|                                         |                                                                  |                                                |                                                   |                                         |                                                                    | female adult malaise oliguria caucasian saddle nose deformity glomerulonephritis ear, nose, and throat complaints anca positive sinusitis and renal failure in an elderly patient                                                                          | Wegener's granulomatosis                                              | yes | no  | 2   | 1   | 1   |
|                                         |                                                                  |                                                |                                                   |                                         |                                                                    | male adult pharyngitis tonsillitis fever fatigue myalgia lymphopenia thrombocytopenia sore throat oral ulcers positive human immunodeficiency virus (hiv) positive pcr history of unprotected sex                                                          | Human immunodeficiency virus (hiv) positive - initial illness (acute) | no  | no  | 1   | 1   | 1   |
|                                         |                                                                  |                                                |                                                   |                                         |                                                                    | male elderly parkinsonian symptoms confusion tremor rigidity bradykinesia depression insomnia                                                                                                                                                              | Dementia in parkinson's disease (and dementia with lewy bodies?)      | no  | no  | 2   | 1   | 1   |
|                                         |                                                                  |                                                |                                                   |                                         |                                                                    | male adult gout attacks tophi elevated uric acid obesity hypercholesterolemia swollen joint                                                                                                                                                                | Gout                                                                  | no  | no  | 1   | 9   | 1   |

|                   |                                                               |                                                                                                                                                                                                                         |                                                                                                      |     |    |   |   |   |
|-------------------|---------------------------------------------------------------|-------------------------------------------------------------------------------------------------------------------------------------------------------------------------------------------------------------------------|------------------------------------------------------------------------------------------------------|-----|----|---|---|---|
| BMC Res Notes.    | 2014 Jan 14;7:36. doi:                                        | female adult dyspnea alterations in blood flow sudden onset shortness of breath prolonged immobilization                                                                                                                | Pulmonary embolism                                                                                   | no  | no | 1 | 8 | 1 |
| Intern Med.       | 2013;52(15):1745-6. Epub doi:                                 | male adult dyspnea elderly syncope deep venous thrombosis                                                                                                                                                               | Pulmonary embolism                                                                                   | no  | no | 1 | 4 | 2 |
| Pediatrics        | 2013 Jul;132(1):e233-8. doi:                                  | female bradycardia hypotension short stature obese adult dry puffy skin sluggish reflexes elevated tsh level delayed bone age                                                                                           | primary Hypothyroidism (and acute ovarian torsion)                                                   | no  | no | 1 | 1 | 1 |
| Pediatrics        | 2013 Feb;131(2):e616-9. doi:                                  | female adult tachycardia insomnia fatigue anorexia difficulty sleeping weight loss exophthalmos elevated t4                                                                                                             | Thyrotoxicosis [hyperthyroidism] (graves' disease)                                                   | no  | no | 1 | 1 | 1 |
| Blood.            | 2012 Jul 26;120(4):708.                                       | female young adult fever myalgia sore throat cervical lymphadenopathy tender cervical lymphadenopathy hepatomegaly splenomegaly lymphocytosis thrombocytopenia atypical lymphocytes                                     | Infectious mononucleosis or ebv infection                                                            | no  | no | 1 | 6 | 1 |
| Arthritis Rheum.  | 2012 Nov;64(11):3759.                                         | female adult polyarthritis positive rheumatoid factor elevated erythrocyte sedimentation rate (esr) (esr) elevated crp xarthritis morning stiffness skin nodules                                                        | Rheumatoid arthritis                                                                                 | no  | no | 9 | 2 | 1 |
| CMAJ.             | 2012 Oct 16;184(15):1714. doi: 10.1503/cmaj.111315. Epub 2012 | female adult human immunodeficiency virus (hiv) positive steroid use myopathy purple striae lower extremity edema weight gain amenorrhea moon face central obesity hypocortisolismx (ritonavir-fluticasone interaction) | Cushing's syndrome                                                                                   | yes | no | 1 | 1 | 2 |
| Circulation       | 2012 Mar 13;125(10):1316-7.                                   | male adult fever back pain tachycardia hypotension positive blood culture leukocytosis valvular vegetations on cardiac echo changing heart murmur                                                                       | Infective endocarditis                                                                               | no  | no | 5 | 1 | 1 |
| Emerg Infect Dis. | 2010 Feb;16(2):360>20. doi: 10.3201/eid1602.                  | male homosexual adult fever sore throat myalgia lymphadenopathy lymphocytosis monocytosis elevated ast and alt                                                                                                          | Human immunodeficiency virus (hiv) positive - initial illness (acute) with antiphospholipid syndrome | no  | no | 1 | 7 | 8 |

|                                                 |                                                    |                                               |                                                     |                                                |                                                                                                                                             |                                            |     |    |   |    |     |
|-------------------------------------------------|----------------------------------------------------|-----------------------------------------------|-----------------------------------------------------|------------------------------------------------|---------------------------------------------------------------------------------------------------------------------------------------------|--------------------------------------------|-----|----|---|----|-----|
| <i>J Infect Dis.</i> 1997 Dec;176 Suppl 2:S139- | <i>Br Med J (Clin Res Ed).</i> 1983 Oct 8;287(639) | <i>Euro Surveill.</i> 2014 Jun 26;19(25) pii: | <i>Cardiovasc J Afr.</i> 2014 Feb 23;25(1): e8-e10. | <i>Indian J Pharmacol.</i> 2014 Jan-Feb;46(1): | initiation of new medication <3 weeks desquamation macules ulcers fever pruritus mucosal ulcers dysphagia dysuria sterile pyuria            | Stevens johnson syndrome                   | yes | no | 1 | 10 | 2   |
|                                                 |                                                    |                                               |                                                     |                                                | adult male hypertension diabetes mellitus st elevation on ecg chest pressure angina                                                         | Acute myocardial infarction (heart attack) | no  | no | 1 | 1  | 1   |
|                                                 |                                                    |                                               |                                                     |                                                | female adult fever headache cough influenza like symptoms dyspnea chest pain diffuse infiltrates on cxr                                     | Influenza - h5n1 (avian)                   | no  | no | 1 | 14 | >20 |
|                                                 |                                                    |                                               |                                                     |                                                | male young adult fever malaise sinus tenderness vision loss pain with palpation of maxillary sinusitis orbital cellulitis periorbital edema | Sinusitis                                  | no  | no | 1 | 2  | 1   |
|                                                 |                                                    |                                               |                                                     |                                                | male adolescent or young adult recent campylobacter infection diarrhea recent infection ascending paralysis weakness acute polyneuropathy   | Guillain-barre syndrome                    | yes | no | 1 | 2  | 1   |

Table 3: Dataset 3 - AJTM and OTHER
