# Supplementary material for: An open access medical knowledge base for community driven diagnostic decision support system development
Source: Springer Nature journal article supplement (doi:10.1186/s12911-019-0804-1), 2019-04-27
Supplement: MOESM4 [file 16681998]

## Appendix B: Search terms for case retrieval

| <b>CATEGORY</b>       | <b>SEARCH TERMS</b>                                 |
|-----------------------|-----------------------------------------------------|
| FEBRILE SYNDROMES     | Fever and Rash                                      |
|                       | Fever and Cough                                     |
|                       | Fever and Abdominal Pain                            |
|                       | Fever and Headache                                  |
|                       | Fever and Joint Pain                                |
|                       | Fever and Diarrhea (non-bloody)                     |
|                       | Fever and Diarrhea (bloody)                         |
|                       | Fever and Dysuria                                   |
|                       | Flu-like Illness                                    |
|                       | Fever of unknown origin (chronic fever of >3 weeks) |
| NON-FEBRILE SYNDROMES | Shortness of Breath                                 |
|                       | Abdominal Pain                                      |
|                       | Cough                                               |
|                       | Back pain                                           |
|                       | Chest Pain                                          |
|                       | Leg Swelling                                        |
|                       | Headache                                            |
|                       | B-symptoms (weight loss, sweats, etc..)             |
|                       | Hemoptysis                                          |
|                       | Altered mental Status                               |

Table 1: Search terms used to retrieve case for the three evaluation datasets
