# Supplementary material for: An open access medical knowledge base for community driven diagnostic decision support system development
Source: Springer Nature journal article supplement (doi:10.1186/s12911-019-0804-1), 2019-04-27
Supplement: MOESM5 [file 16681998]

## Appendix C: Overview of Evaluation Results

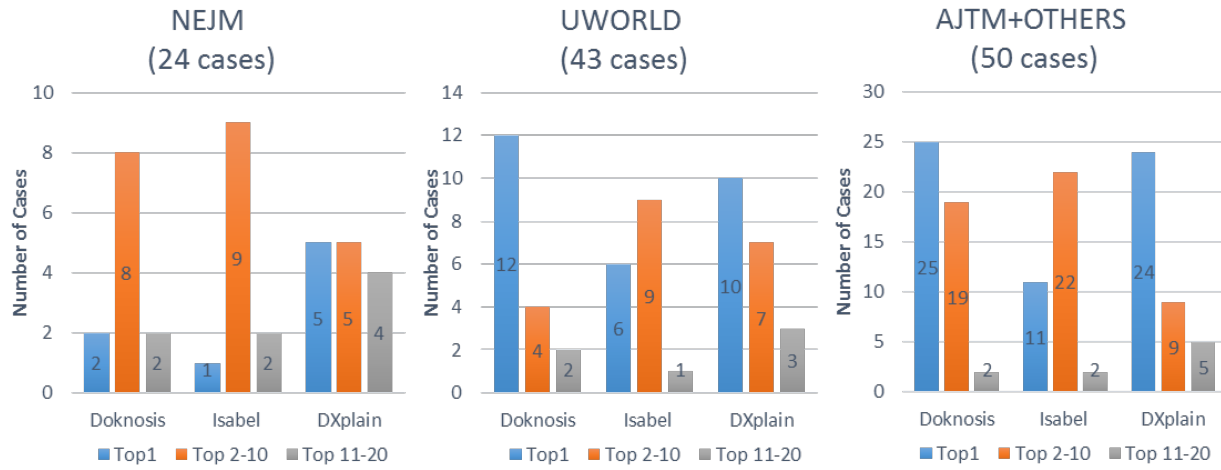

Figure 1: Comparison of Doknosnis, Isabel and DXplain analyzing test cases from the three different datasets. Each bar depicts the number of cases for a specific dataset and DDX generator that ranked the correct diagnosis in the reported bucket.
